# Supplementary material
Source: ML conference proceedings conference paper supplement (https://openreview.net/forum?id=EifoVoIyd5)
Supplement: supplementary_material [file attachment]

# Supplemental Material

Anonymous Author(s)

Affiliation

Address

email

Our supplementary materials covers the following: background on 3D object detection in the range view, additional quantitative results, qualitative results, dataset details, and implementation details for our models.

## 1 Range View Representation

The range view representation, also known as a range image, is a 2D grid containing the spherical coordinates of an observed point with respect to the lidar laser’s original reference frame. We define a range image as:

$$r \triangleq \{(\varphi_{ij}, \theta_{ij}, r_{ij}) : 1 \leq i \leq H; 1 \leq j \leq W\}, \quad (1)$$

where  $(\varphi_{ij}, \theta_{ij}, r_{ij})$  are the inclination, azimuth, and range, and  $H, W$  are the height and width of the image. Importantly, the cells of a range image are not limited to containing only spherical coordinates. They may also contain auxiliary sensor information such as a lidar’s intensity.

### 1.1 3D Object Detection

Given a range image  $r$ , we construct a set of 3D object proposals which are ranked by a confidence score. Each proposal consists of a proposed location, size, orientation, and category. Let  $\mathcal{D}$  represent are predictions from a network.

$$\mathcal{D} \triangleq \{d_i \in \mathbb{R}^8\}_{i=1}^K, \text{ where } K \subset \mathbb{N}, \quad (2)$$

$$d_i \triangleq \{x_i^{\text{ego}}, y_i^{\text{ego}}, z_i^{\text{ego}}, l_i, w_i, h_i, \theta_i, c_i\} \quad (3)$$

where  $x_i^{\text{ego}}, y_i^{\text{ego}}, z_i^{\text{ego}}$  are the coordinates of the object in the ego-vehicle reference frame,  $l_i, w_i, h_i$  are the length, width, and height of the object,  $\theta_i$  is the counter-clockwise rotation about the vertical axis, and  $c_i$  is the object likelihood. Similarly, we define the ground truth cuboids as:

$$\mathcal{G} \triangleq \{g_i \in \mathbb{R}^8\}_{i=1}^M, \text{ where } M \subset \mathbb{N}, \quad (4)$$

$$g_i \triangleq \{x_i^{\text{ego}}, y_i^{\text{ego}}, z_i^{\text{ego}}, l_i, w_i, h_i, \theta_i, q_i\}, \quad (5)$$

where  $q_i$  is a continuous value computed dynamically during training. For example,  $q_i$  may be set to Dynamic 3D Centerness or IoU<sub>BEV</sub>. The detected objects,  $\mathcal{D}$  are decoded as the same parameterization as  $\mathcal{G}$ .

$$\mathcal{D} \triangleq \{d_k \in \mathbb{R}^8 : c_1 \geq \dots \geq c_k\}_{k=1}^K, \text{ where } K \subset \mathbb{N}, \quad (6)$$

$$d_k \triangleq \{x_k^{\text{ego}}, y_k^{\text{ego}}, z_k^{\text{ego}}, l_k, w_k, h_k, \theta_k\}. \quad (7)$$

We seek to predict a continuous representation of the ground truth targets as:

$$\mathcal{D} \triangleq \{d_k \in \mathbb{R}^8 : c_1 \geq \dots \geq c_k\}_{k=1}^K, \text{ where } K \subset \mathbb{N}, \quad (8)$$

$$g_k \triangleq \{x_k^{\text{ego}}, y_k^{\text{ego}}, z_k^{\text{ego}}, l_k, w_k, h_k, \theta_k, c_k\}, \quad (9)$$

where  $x_k^{\text{ego}}, y_k^{\text{ego}}, z_k^{\text{ego}}$  are the coordinates of the object in the ego-vehicle reference frame,  $l_k, w_k, h_k$  are the length, width, and height of the object,  $\theta_k$  is the counter-clockwise rotation about the vertical axis, and  $c_k$  is the object category likelihood.

25 **3D Anchor Points in the Range View.** To predict objects, we bias our predictions by the location  
 26 of *observed* 3D points which are features of the projected pixels in a range image. For all the 3D  
 27 points contained in a range image, we produce a detection  $d_k$ .

28 **Regression Targets.** Following previous literature, we do not directly predict the object proposal  
 29 representation in Section 1.1. Instead, we define the regression targets as the following:

$$\mathcal{T}(\mathcal{P}, \mathcal{G}) = \{t_i(p_i, g_i) \in \mathbb{R}^8\}_{i=1}^K, \text{ where } K \in \mathbb{N}, \quad (10)$$

$$t_i(p_i, g_i) = \{\Delta x_i, \Delta y_i, \Delta z_i, \log l_i, \log w_i, \log h_i, \sin \theta_i, \cos \theta_i\}, \quad (11)$$

30 where  $\mathcal{P}$  and  $\mathcal{G}$  are the sets of points in the range image and the ground truth cuboids in the 3D  
 31 scene,  $\Delta x_i, \Delta y_i, \Delta z_i$  are the offsets from the point to the associated ground truth cuboid in the  
 32 point-azimuth reference frame,  $\log l_i, \log w_i, \log h_i$  are the logarithmic length, width, and height of  
 33 the object, respectively, and  $\sin \theta_i, \cos \theta_i$  are continuous representations of the object’s heading  $\theta_i$ .

34 **Classification Loss.** Once all of the candidate foreground points have been ranked and assigned,  
 35 each point needs to incur loss proportional to its regression quality. We use Varifocal loss [1] with a  
 36 sigmoid-logit activation for our classification loss:

$$\text{VFL}(c_i, q_i) = \begin{cases} q_i(-q_i \log(c_i) + (1 - q_i) \log(1 - c_i)) & \text{if } q_i > 0 \\ -\alpha c_i^\gamma \log(1 - c_i) & \text{otherwise,} \end{cases} \quad (12)$$

37 where  $c_i$  is classification likelihood and  $q_i$  is 3D classification targets (*e.g.*, Dynamic IoU<sub>BEV</sub> or  
 38 Dynamic 3D Centerness). Our final classification loss for an entire 3D scene is:

$$\mathcal{L}_c = \frac{1}{M} \sum_{j=1}^N \sum_{i=1}^{|\mathcal{P}_G^j|} \text{VFL}(c_i^j, q_i^j), \quad (13)$$

39 where  $M$  is the total number of foreground points,  $N$  is the total number of objects in a scene,  $\mathcal{P}_G^j$   
 40 is the set of 3D points which fall inside the  $j^{\text{th}}$  ground truth cuboid,  $c_i^j$  is the likelihood from the  
 41 network classification head, and  $q_i^j$  is the 3D classification target.

42 **Regression Loss.** We use an  $\ell_1$  regression loss to predict the regression residuals. The regression  
 43 loss for an entire 3D scene is:

$$\mathcal{L}_r = \frac{1}{N} \sum_{j=1}^N \frac{1}{|\mathcal{P}_G^j|} \sum_{i=1}^{|\mathcal{P}_G^j|} \text{L1Loss}(r_i^j, t_i^j), \quad (14)$$

44 where  $N$  is the total number of objects in a scene,  $\mathcal{P}_G^j$  is the set of 3D points which fall inside the  $j^{\text{th}}$   
 45 ground truth cuboid,  $r_i^j$  is the predicted cuboid parameters from the network, and  $t_i^j$  are the target  
 46 residuals to be predicted.

47 **Total Loss.** Our final loss is written as:

$$\mathcal{L} = \mathcal{L}_c + \mathcal{L}_r \quad (15)$$

## 48 1.2 Argoverse 2

49 Additional details on the evaluation metrics used in the Argoverse 2.

- 50 • **Average Precision (AP):** VOC-style computation with a true positive defined at 3D Eu-  
 51 clidean distance averaged over 0.5 m, 1.0 m, 2.0 m, and 4.0 m.
- 52 • **Average Translation Error (ATE):** 3D Euclidean distance for true positives at 2 m.
- 53 • **Average Scale Error (ASE):** Pose-aligned 3D IoU for true positives at 2 m.
- 54 • **Average Orientation Error (AOE):** Smallest yaw angle between the ground truth and  
 55 prediction for true positives at 2 m.

- **Composite Detection Score (CDS):** Weighted average between AP and the normalized true positive scores:

$$\text{CDS} = \text{AP} \cdot \sum_{x \in \mathcal{X}} 1 - x, \text{ where } x \in \{\text{ATE}_{\text{unit}}, \text{ASE}_{\text{unit}}, \text{AOE}_{\text{unit}}\}. \quad (16)$$

We refer readers to Wilson *et al.* [2] for further details.

### 1.3 Waymo Open

Additional details on the evaluation metrics used in the Waymo Open are listed below.

1. **3D Mean Average Precision (mAP):** VOC-style computation with a true positive defined by 3D IoU. The gravity-aligned-axis is fixed.
  - (a) **Level 1 (L1):** All ground truth cuboids with at least five lidar points within them.
  - (b) **Level 2 (L2):** All ground cuboids with at least 1 point and additionally incorporates heading into its true positive criteria.

Following RangeDet [3], we report L1 results.

## 2 Range-view 3D Object Detection

**Baseline Model.** Our baseline models are all multi-class and utilize the Deep Layer Aggregation (DLA) [4] architecture with an input feature dimensionality of 64. In our Argoverse 2 experiments, we incorporate five input features: x, y, z, range, and intensity, while for our Waymo experiments, we include six input features: x, y, z, range, intensity, and elongation. These inputs are then transformed to the backbone feature dimensionality of 64 using a single basic block. For post-processing, we use weighted non-maximum suppression (WNMS). All models are trained and evaluated using mixed-precision with BrainFloat16 [5]. Both models use a OneCycle scheduler with AdamW using a learning rate of 0.03 across four A40 gpus. All models in the ablations are trained for 5 epochs on a uniformly sub-sampled fifth of the training set.

**State-of-the-art Comparison Model.** We leverage the best performing and most general methods from our experiments for our state-of-the-art comparison for both the Argoverse 2 and Waymo Open dataset models. The Argoverse 2 and Waymo Open models use an input feature dimensionality of 256 and 128, respectively. Both models uses the Meta-Kernel and a 3D input encoding, Dynamic 3D Centerness for their classification supervision, and we use our proposed Range-Subsampling with range partitions of [0 - 30 m), [30 m, 50 m), [50 m,  $\infty$ ) with subsampling rates of 8, 2, 1, respectively. For both datasets, models are trained for 20 epochs.

| Method                         | mAP $\uparrow$ | ATE $\downarrow$ | ASE $\downarrow$ | AOE $\downarrow$ | CDS $\uparrow$ |
|--------------------------------|----------------|------------------|------------------|------------------|----------------|
| Dynamic IoU <sub>BEV</sub> [3] | 14.2           | 0.87             | 0.51             | 1.24             | 10.9           |
| Dynamic 3D Centerness (ours)   | <b>16.9</b>    | <b>0.77</b>      | <b>0.46</b>      | <b>1.04</b>      | <b>12.8</b>    |

Table 1: **Classification Supervision: Argoverse 2.** Evaluation metrics and errors using two different classification supervision methods on the Argoverse 2 *validation* set. We observe that our Dynamic 3D Centerness method outperforms all methods. Surprisingly, Dynamic 3D centerness outperforms IoU<sub>BEV</sub> in average translation, scale, orientation errors.

### 2.1 Qualitative Results

We include qualitative results for both Argoverse 2 and Waymo Open shown in Figs. 1 and 2.

| Method                         | 3D AP <sub>L1</sub> ↑ |              |              |
|--------------------------------|-----------------------|--------------|--------------|
|                                | Vehicle               | Pedestrian   | Cyclist      |
| Dynamic IoU <sub>BEV</sub> [3] | 59.90                 | 67.08        | 25.52        |
| Dynamic 3D Centerness (ours)   | <b>59.98</b>          | <b>68.03</b> | <b>34.66</b> |

Table 2: **Classification Supervision: Waymo Open.** Evaluation metrics and errors using two different classification supervision methods on the Waymo Open *validation* set. Our results suggest that Dynamic 3D Centerness is a competitive alternative to IoU<sub>BEV</sub>, while being simpler.

| Method                  | mAP ↑       | ATE ↓       | ASE ↓       | AOE ↓       | CDS ↑       |
|-------------------------|-------------|-------------|-------------|-------------|-------------|
| Basic Block             | 16.7        | <b>0.78</b> | <b>0.47</b> | <b>1.15</b> | 12.7        |
| Meta Kernel [3]         | <b>18.7</b> | 0.80        | 0.50        | 1.18        | <b>14.1</b> |
| Range Aware Kernel* [6] | 16.3        | 0.81        | 0.51        | 1.23        | 12.4        |

Table 3: **3D Input Encoding: Argoverse 2.** Mean Average Precision using different 3D input feature encodings on the Argoverse 2 *validation* set. \*: Code unavailable. Re-implemented by ourselves.

| Method                  | 3D AP <sub>L1</sub> ↑ |              |              |
|-------------------------|-----------------------|--------------|--------------|
|                         | Vehicle               | Pedestrian   | Cyclist      |
| Basic Block             | 60.27                 | 66.95        | 22.42        |
| Meta Kernel [3]         | <b>64.44</b>          | <b>72.75</b> | <b>43.52</b> |
| Range Aware Kernel* [6] | 60.00                 | 66.42        | 18.54        |

Table 4: **3D Input Encoding: Waymo Open.** L1 Average Precision (AP) across three different 3D input feature encodings on the Waymo *validation* set. The Meta Kernel outperforms all methods improving AP considerably across all categories. Surprisingly, the Range Aware Kernel performs worse than our baseline method. \*: Code unavailable. Re-implemented by ourselves based on details in the manuscript [6].

|                  | Mean        | R. Vehicle  | Pedestrian  | Rollard     | C. Barrel   | C. Cone     | S. Sign | Bicycle     | L. Vehicle | R. Truck    | W. Device | Sign        | Bus         | V. Trailer  | Truck       | Motorcycle  | T. Cab | Bicyclist   | S. Bus      | W. Rider | Motorcyclist | Dog  | A. Bus      | M.P.C. Sign | Stroller    | Wheelchair | M.B. Trailer |
|------------------|-------------|-------------|-------------|-------------|-------------|-------------|---------|-------------|------------|-------------|-----------|-------------|-------------|-------------|-------------|-------------|--------|-------------|-------------|----------|--------------|------|-------------|-------------|-------------|------------|--------------|
| Distribution (%) | -           | 56.92       | 17.95       | 6.8         | 3.62        | 2.63        | 1.99    | 1.42        | 1.25       | 1.09        | 1.06      | 0.91        | 0.83        | 0.69        | 0.54        | 0.47        | 0.44   | 0.38        | 0.2         | 0.18     | 0.16         | 0.15 | 0.1         | 0.08        | 0.06        | 0.05       | 0.0          |
| mAP ↑            |             |             |             |             |             |             |         |             |            |             |           |             |             |             |             |             |        |             |             |          |              |      |             |             |             |            |              |
| CenterPoint [7]  | 22.0        | 67.6        | 46.5        | 40.1        | 32.2        | 29.5        | -       | 24.5        | 3.9        | 37.4        | -         | 6.3         | 38.9        | 22.4        | 22.6        | 33.4        | -      | -           | -           | -        | -            | -    | -           | 26.4        | 13.8        | -          | -            |
| FSD [8]          | 28.2        | 68.1        | 59.0        | 41.8        | 64.9        | 41.2        | -       | 38.6        | 5.9        | 38.5        | -         | 11.9        | 40.9        | <b>26.9</b> | 14.8        | 49.0        | -      | 33.4        | 30.5        | -        | 39.7         | -    | <b>20.4</b> | 39.4        | 15.7        | -          | -            |
| VoxelNext [9]    | 30.7        | 72.7        | 63.2        | <b>53.9</b> | 64.9        | 44.9        | -       | <b>40.6</b> | 6.8        | <b>40.1</b> | -         | 14.9        | 38.8        | 20.9        | 19.9        | 42.4        | -      | 32.4        | 25.2        | -        | <b>44.7</b>  | -    | 20.1        | 39.4        | 15.7        | -          | -            |
| Ours             | <b>31.6</b> | <b>75.7</b> | <b>67.2</b> | 48.6        | <b>70.2</b> | <b>50.3</b> | 39.6    | 40.0        | <b>7.5</b> | 32.6        | 19.6      | <b>18.0</b> | <b>44.0</b> | 22.0        | <b>24.0</b> | <b>49.5</b> | 19.3   | <b>34.4</b> | <b>44.0</b> | 5.5      | 42.1         | 5.8  | 9.9         | <b>41.5</b> | <b>17.7</b> | 3.4        | 0.0          |

Table 5: **State-of-the-Art Comparison: Argoverse 2 (All categories).** We compare our range-view model against different state-of-the-art, peer-reviewed methods on the Argoverse 2 *validation* dataset. This table includes all categories — some which were omitted due to space in the main manuscript.

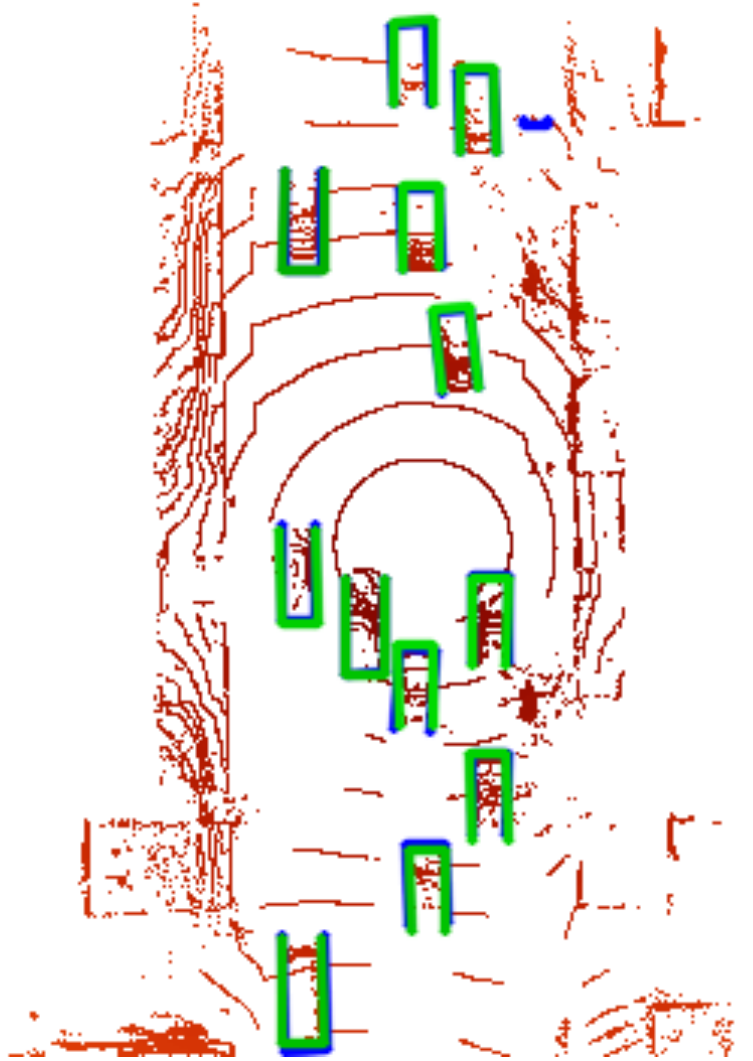

Figure 1: **Qualitative Results: Argoverse 2.** True positives (green) and ground truth cuboids (blue) are shown below for our best performing model. True positives are shown using a 2 m Euclidean distance from the ground truth cuboid center.

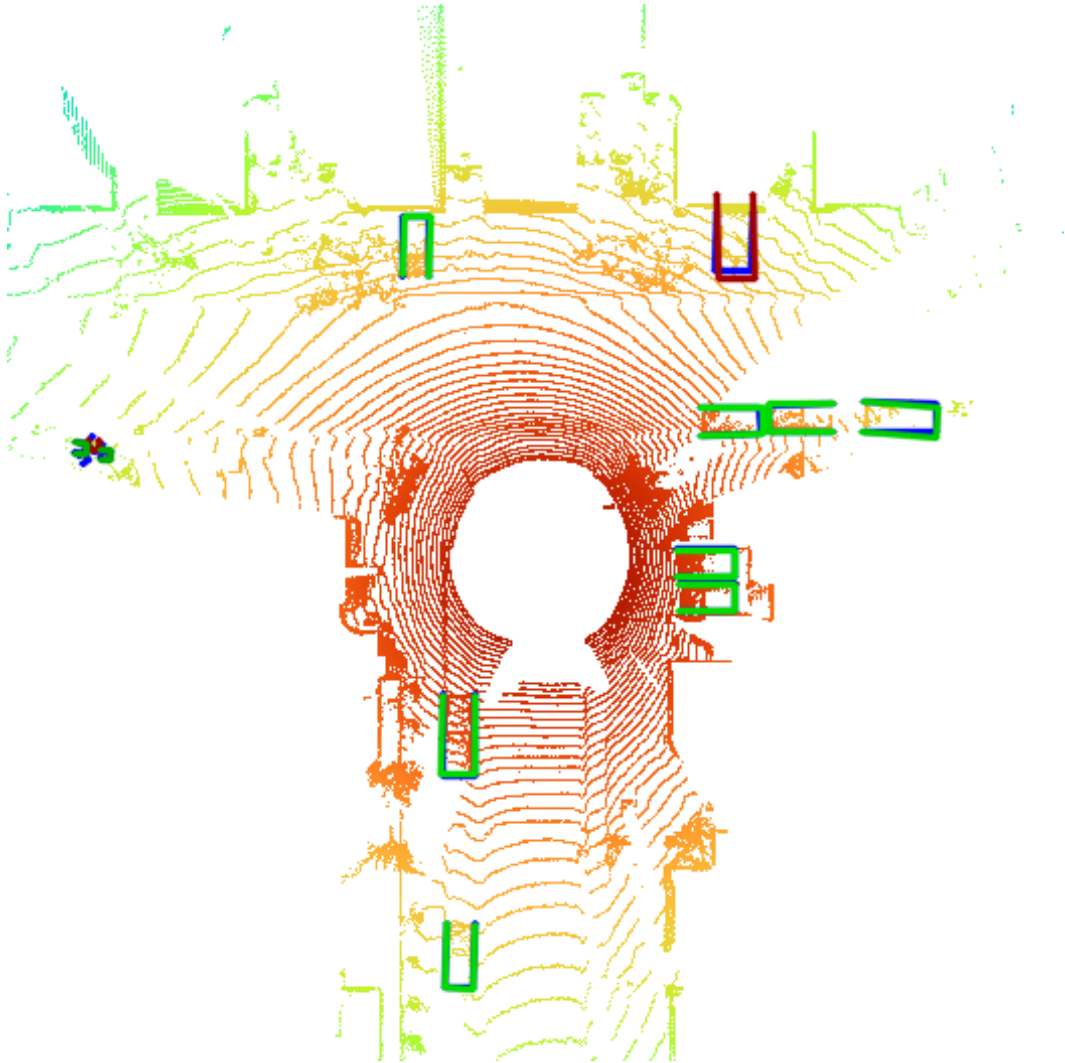

Figure 2: **Qualitative Results: Waymo Open.** True positives (green), false positives (red) and ground truth cuboids (blue) are shown below for our best performing model. True positives are shown using a 0.5 IoU threshold.

## References

- [1] H. Zhang, Y. Wang, F. Dayoub, and N. Sunderhauf. VarifocalNet: An IoU-Aware Dense Object Detector. In *Proceedings of the IEEE/CVF Conference on Computer Vision and Pattern Recognition*, pages 8514–8523, 2021.
- [2] B. Wilson, W. Qi, T. Agarwal, J. Lambert, J. Singh, S. Khandelwal, B. Pan, R. Kumar, A. Hartnett, J. Kaesemodel Pontes, D. Ramanan, P. Carr, and J. Hays. Argoverse 2: Next Generation Datasets for Self-Driving Perception and Forecasting. *Proceedings of the Neural Information Processing Systems Track on Datasets and Benchmarks*, 1, Dec. 2021.
- [3] L. Fan, X. Xiong, F. Wang, N. Wang, and Z. Zhang. RangeDet: In Defense of Range View for LiDAR-Based 3D Object Detection. In *Proceedings of the IEEE/CVF International Conference on Computer Vision*, pages 2918–2927, 2021.
- [4] F. Yu, D. Wang, E. Shelhamer, and T. Darrell. Deep Layer Aggregation. In *Proceedings of the IEEE Conference on Computer Vision and Pattern Recognition*, pages 2403–2412, 2018.
- [5] D. Kalamkar, D. Mudigere, N. Mellempudi, D. Das, K. Banerjee, S. Avancha, D. T. Vooturi, N. Jammalamadaka, J. Huang, H. Yuen, et al. A study of bfloat16 for deep learning training. *arXiv preprint arXiv:1905.12322*, 2019.
- [6] Y. Bai, B. Fei, Y. Liu, T. Ma, Y. Hou, B. Shi, and Y. Li. Rangeperception: Taming lidar range view for efficient and accurate 3d object detection. *Advances in Neural Information Processing Systems*, 36, 2024.
- [7] T. Yin, X. Zhou, and P. Krahenbuhl. Center-Based 3D Object Detection and Tracking. In *Proceedings of the IEEE/CVF Conference on Computer Vision and Pattern Recognition*, pages 11784–11793, 2021.
- [8] L. Fan, F. Wang, N. Wang, and Z. Zhang. Fully Sparse 3D Object Detection, Oct. 2022.
- [9] Y. Chen, J. Liu, X. Zhang, X. Qi, and J. Jia. Voxelnex: Fully sparse voxelnet for 3d object detection and tracking. In *Proceedings of the IEEE/CVF Conference on Computer Vision and Pattern Recognition*, pages 21674–21683, 2023.
